# Supplementary material for: Blood Phytosterol Concentration and Genetic Variant Associations in a Sample Population
Source: MDPI journal article supplement (doi:10.3390/nu16071067), 2024-04-05
Supplement: s1 [file s1]

## S1. Plasma Sterol levels and variants

| PS Fraction               | rs4148217    |              |              | p*   |
|---------------------------|--------------|--------------|--------------|------|
|                           | CC (n=122)   | CA (n=58)    | AA (n=5)     |      |
| Total PS (µg/mL)          | 2.08±1.59    | 1.65±1.22    | 1.80±1.36    | 0.19 |
| Campesterol (µg/mL)       | 0.90±0.91    | 0.74±0.91    | 0.97±1.08    | 0.51 |
| Sitosterol (µg/mL)        | 0.91±0.74    | 0.70±0.45    | 0.64±0.31    | 0.12 |
| Sitostanol (µg/mL) *10    | 0.25±0.19    | 0.22±0.16    | 0.17±0.13    | 0.27 |
| Lanosterol (µg/mL) *10    | 0.95±1.02    | 0.76±0.69    | 0.82±0.73    | 0.41 |
| Stigmasterol (µg/mL) *10  | 1.05±1.43    | 1.00±0.91    | 0.64±0.39    | 0.77 |
| Total Cholesterol (mg/dL) | 104.93±60.62 | 97.93±51.14  | 74.75±54.86  | 0.43 |
| PS Fraction               | rs4245791    |              |              | p*   |
|                           | CC (n=19)    | TC (n=79)    | TT (n=87)    |      |
| Total PS (µg/mL)          | 2.37±2.06    | 2.00±1.63    | 1.78±1.16    | 0.26 |
| Campesterol (µg/mL)       | 1.09±1.12    | 0.95±1.12    | 0.71±0.58    | 0.12 |
| Sitosterol (µg/mL)        | 1.02±0.93    | 0.82±0.64    | 0.81±0.62    | 0.42 |
| Sitostanol (µg/mL) *10    | 0.26±0.22    | 0.22±0.16    | 0.25±0.19    | 0.50 |
| Lanosterol (µg/mL) *10    | 0.99±1.03    | 0.90±1.04    | 0.85±0.79    | 0.84 |
| Stigmasterol (µg/mL) *10  | 1.07±1.09    | 1.01±1.51    | 1.02±1.06    | 0.99 |
| Total Cholesterol (mg/dL) | 104.22±69.53 | 106.01±62.13 | 97.71±50.62  | 0.64 |
| PS Fraction               | rs657152     |              |              | p*   |
|                           | GG (n=66)    | GT (n=90)    | TT (n=29)    |      |
| Total PS (µg/mL)          | 1.71±1.27    | 2.11±1.71    | 1.93±1.12    | 0.26 |
| Campesterol (µg/mL)       | 0.67±0.58    | 0.98±1.15    | 0.84±0.53    | 0.11 |
| Sitosterol (µg/mL)        | 0.76±0.65    | 0.88±0.69    | 0.87±0.62    | 0.49 |
| Sitostanol (µg/mL) *10    | 0.22±0.18    | 0.25±0.19    | 0.24±0.18    | 0.57 |
| Lanosterol (µg/mL) *10    | 0.83±0.78    | 0.97±1.11    | 0.75±0.51    | 0.45 |
| Stigmasterol (µg/mL) *10  | 1.17±1.81    | 0.96±0.85    | 0.87±0.77    | 0.48 |
| Total Cholesterol (mg/dL) | 103.92±54.33 | 99.36±64.06  | 105.31±43.56 | 0.84 |
| PS Fraction               | rs11887534   |              |              | p*   |
|                           | GC (n=27)    | GG (n=158)   |              |      |
| Total PS (µg/mL)          | 1.86±1.87    | 1.95±1.42    |              | 0.77 |
| Campesterol (µg/mL)       | 0.92±1.35    | 0.84±0.82    |              | 0.68 |
| Sitosterol (µg/mL)        | 0.71±0.52    | 0.85±0.68    |              | 0.31 |
| Sitostanol (µg/mL) *10    | 0.21±0.14    | 0.24±0.19    |              | 0.36 |
| Lanosterol (µg/mL) *10    | 1.03±0.90    | 0.86±0.93    |              | 0.40 |
| Stigmasterol (µg/mL) *10  | 0.69±0.36    | 1.08±1.36    |              | 0.00 |
| Total Cholesterol (mg/dL) | 98.97±50.95  | 102.43±58.85 |              | 0.78 |
| PS Fraction               | rs41360247   |              |              | p*   |
|                           | TC (n=26)    | TT (n=159)   |              |      |
| Total PS (µg/mL)          | 1.86±1.90    | 1.95±1.41    |              | 0.78 |
| Campesterol (µg/mL)       | 0.91±1.38    | 0.84±0.81    |              | 0.71 |
| Sitosterol (µg/mL)        | 0.68±0.54    | 0.86±0.68    |              | 0.19 |
| Sitostanol (µg/mL) *10    | 0.21±0.14    | 0.24±0.19    |              | 0.31 |
| Lanosterol (µg/mL) *10    | 1.31±1.40    | 0.82±0.81    |              | 0.09 |
| Stigmasterol (µg/mL) *10  | 0.85±0.63    | 1.05±1.34    |              | 0.45 |
| Total Cholesterol (mg/dL) | 94.61±52.44  | 103.12±58.52 |              | 0.49 |

\* P by F Snedecor

S2a. Association between plasma phytosterols and categorical variables (univariant analysis)

| Variable (n)                          | Mean±SD   | p    |
|---------------------------------------|-----------|------|
| <b>Total phytosterols (µg/mL)</b>     |           |      |
| <b>Sex</b>                            |           | 0.12 |
| Women (n=115)                         | 2.06±1.70 |      |
| Men (n=70)                            | 1.74±1.03 |      |
| <b>Pastries</b>                       |           | 0.08 |
| No consumption (n=94)                 | 2.12±1.70 |      |
| 1-3 times a week (n=78)               | 1.84±1.25 |      |
| >3 times a week (n=13)                | 1.18±0.59 |      |
| <b>Nuts</b>                           |           | 0.82 |
| No consumption (n=58)                 | 1.84±1.52 |      |
| 1-3 times a week (n=99)               | 1.97±1.56 |      |
| >3 times a week (n=28)                | 2.03±1.12 |      |
| <b>Sausages</b>                       |           | 0.36 |
| No consumption (n=24)                 | 1.74±1.00 |      |
| 1-3 times a week (n=103)              | 2.08±1.77 |      |
| >3 times a week (n=58)                | 1.77±1.01 |      |
| <b>Cholesterol-lowering treatment</b> |           | 0.89 |
| No (n=169)                            | 1.94±1.51 |      |
| Yes (n=16)                            | 1.89±1.21 |      |
| <b>Vitamins</b>                       |           | 0.98 |
| No (n=173)                            | 1.93±1.51 |      |
| Yes (n=12)                            | 1.95±1.05 |      |
| <b>PS-enriched supplements</b>        |           | 0.21 |
| No (n=177)                            | 1.91±1.48 |      |
| Yes (n=8)                             | 2.58±1.42 |      |
| <b>Vegetarian-vegan</b>               |           | 0.90 |
| No (n=176)                            | 1.94±1.50 |      |
| Yes (n=9)                             | 2.00±1.24 |      |
| <b>Sitosterol (µg/mL)</b>             |           |      |
| <b>Sex</b>                            |           | 0.01 |
| Women (n=115)                         | 0.93±0.75 |      |
| Men (n=70)                            | 0.68±0.46 |      |
| <b>Pastries</b>                       |           | 0.04 |
| No consumption (n=94)                 | 0.89±0.70 |      |
| 1-3 times a week (n=78)               | 0.84±0.64 |      |
| >3 times a week (n=13)                | 0.40±0.27 |      |
| <b>Nuts</b>                           |           | 0.48 |
| No consumption (n=58)                 | 0.75±0.59 |      |
| 1-3 times a week (n=99)               | 0.88±0.74 |      |

|                                       |           |      |
|---------------------------------------|-----------|------|
| >3 times a week (n=28)                | 0.84±0.52 |      |
| <b>Sausages</b>                       |           | 0.70 |
| No consumption (n=24)                 | 0.86±0.57 |      |
| 1-3 times a week (n=103)              | 0.86±0.76 |      |
| >3 times a week (n=58)                | 0.77±0.50 |      |
| <b>Cholesterol-lowering treatment</b> |           | 0.16 |
| No (n=169)                            | 0.86±0.68 |      |
| Yes (n=16)                            | 0.61±0.48 |      |
| <b>Vitamins</b>                       |           | 0.65 |
| No (n=173)                            | 0.83±0.67 |      |
| Yes (n=12)                            | 0.92±0.60 |      |
| <b>PS-enriched supplements</b>        |           | 0.10 |
| No (n=177)                            | 0.82±0.65 |      |
| Yes (n=8)                             | 1.21±0.79 |      |
| <b>Vegetarian-vegan</b>               |           | 0.58 |
| No (n=176)                            | 0.83±0.66 |      |
| Yes (n=9)                             | 0.96±0.70 |      |
| <b>Campesterol (µg/ml)</b>            |           |      |
| <b>Sex</b>                            |           | 0.59 |
| Women (n=115)                         | 0.88±1.02 |      |
| Men (n=70)                            | 0.81±0.69 |      |
| <b>Pastries</b>                       |           | 0.11 |
| No consumption (n=94)                 | 0.98±1.13 |      |
| 1-3 times a week (n=78)               | 0.74±0.60 |      |
| >3 times a week (n=13)                | 0.57±0.34 |      |
| <b>Nuts</b>                           |           | 0.85 |
| No consumption (n=58)                 | 0.84±1.08 |      |
| 1-3 times a week (n=99)               | 0.83±0.85 |      |
| >3 times a week (n=28)                | 0.94±0.73 |      |
| <b>Sausages</b>                       |           | 0.22 |
| No consumption (n=24)                 | 0.65±0.41 |      |
| 1-3 times a week (n=103)              | 0.95±1.07 |      |
| >3 times a week (n=58)                | 0.76±0.72 |      |
| <b>Cholesterol-lowering treatment</b> |           | 0.29 |
| No (n=169)                            | 0.83±0.92 |      |
| Yes (n=16)                            | 1.08±0.75 |      |
| <b>Vitamins</b>                       |           | 0.86 |
| No (n=173)                            | 0.85±0.93 |      |
| Yes (n=12)                            | 0.81±0.47 |      |
| <b>PS-enriched supplements</b>        |           | 0.38 |
| No (n=177)                            | 0.84±0.92 |      |

|                                       |           |                 |
|---------------------------------------|-----------|-----------------|
| Yes (n=8)                             | 1.13±0.66 |                 |
| <b>Vegetarian-vegan</b>               |           | 0.70            |
| No (n=176)                            | 0.86±0.93 |                 |
| Yes (n=9)                             | 0.74±0.48 |                 |
| <b>Sitostanol (µg/ml)</b>             |           |                 |
| <b>Sex</b>                            |           | <b>&lt;0.01</b> |
| Women (n=115)                         | 0.03±0.02 |                 |
| Men (n=70)                            | 0.02±0.01 |                 |
| <b>Pastries</b>                       |           | <b>0.03</b>     |
| No consumption (n=94)                 | 0.02±0.02 |                 |
| 1-3 times a week (n=78)               | 0.03±0.02 |                 |
| >3 times a week (n=13)                | 0.01±0.01 |                 |
| <b>Nuts</b>                           |           | 0.49            |
| No consumption (n=58)                 | 0.02±0.01 |                 |
| 1-3 times a week (n=99)               | 0.03±0.02 |                 |
| >3 times a week (n=28)                | 0.02±0.02 |                 |
| <b>Sausages</b>                       |           | 0.27            |
| No consumption (n=24)                 | 0.03±0.01 |                 |
| 1-3 times a week (n=103)              | 0.02±0.02 |                 |
| >3 times a week (n=58)                | 0.02±0.02 |                 |
| <b>Cholesterol-lowering treatment</b> |           | <b>&lt;0.01</b> |
| No (n=169)                            | 0.03±0.02 |                 |
| Yes (n=16)                            | 0.01±0.01 |                 |
| <b>Vitamins</b>                       |           | 0.84            |
| No (n=173)                            | 0.02±0.02 |                 |
| Yes (n=12)                            | 0.02±0.02 |                 |
| <b>PS-enriched supplements</b>        |           | 0.23            |
| No (n=177)                            | 0.02±0.02 |                 |
| Yes (n=8)                             | 0.03±0.02 |                 |
| <b>Vegetarian-vegan</b>               |           | 0.12            |
| No (n=176)                            | 0.02±0.02 |                 |
| Yes (n=9)                             | 0.03±0.02 |                 |
| <b>Lanosterol (µg/ml)</b>             |           |                 |
| <b>Sex</b>                            |           | <b>0.01</b>     |
| Women (n=115)                         | 0.07±0.07 |                 |
| Men (n=70)                            | 0.12±0.11 |                 |
| <b>Pastries</b>                       |           | 0.08            |
| No consumption (n=94)                 | 0.10±0.10 |                 |
| 1-3 times a week (n=78)               | 0.07±0.08 |                 |
| >3 times a week (n=13)                | 0.12±0.11 |                 |

|                                       |           |      |
|---------------------------------------|-----------|------|
| <b>Nuts</b>                           |           | 0.15 |
| No consumption (n=58)                 | 0.10±0.12 |      |
| 1-3 times a week (n=99)               | 0.08±0.06 |      |
| >3 times a week (n=28)                | 0.11±0.10 |      |
| <b>Sausages</b>                       |           | 0.54 |
| No consumption (n=24)                 | 0.07±0.06 |      |
| 1-3 times a week (n=103)              | 0.09±0.09 |      |
| >3 times a week (n=58)                | 0.10±0.10 |      |
| <b>Cholesterol-lowering treatment</b> |           | 0.43 |
| No (n=169)                            | 0.09±0.09 |      |
| Yes (n=16)                            | 0.11±0.08 |      |
| <b>Vitamins</b>                       |           | 0.68 |
| No (n=173)                            | 0.09±0.09 |      |
| Yes (n=12)                            | 0.08±0.07 |      |
| <b>PS-enriched supplements</b>        |           | 0.67 |
| No (n=177)                            | 0.09±0.09 |      |
| Yes (n=8)                             | 0.10±0.12 |      |
| <b>Vegetarian-vegan</b>               |           | 0.76 |
| No (n=176)                            | 0.09±0.09 |      |
| Yes (n=9)                             | 0.08±0.06 |      |
| <b>Stigmasterol (µg/ml)</b>           |           |      |
| <b>Sex</b>                            |           | 0.50 |
| Women (n=115)                         | 0.11±0.14 |      |
| Men (n=70)                            | 0.09±0.10 |      |
| <b>Pastries</b>                       |           | 0.19 |
| No consumption (n=94)                 | 0.10±0.10 |      |
| 1-3 times a week (n=78)               | 0.12±0.16 |      |
| >3 times a week (n=13)                | 0.05±0.03 |      |
| <b>Nuts</b>                           |           | 0.66 |
| No consumption (n=58)                 | 0.09±0.07 |      |
| 1-3 times a week (n=99)               | 0.11±0.16 |      |
| >3 times a week (n=28)                | 0.09±0.06 |      |
| <b>Sausages</b>                       |           | 0.63 |
| No consumption (n=24)                 | 0.09±0.05 |      |
| 1-3 times a week (n=103)              | 0.11±0.16 |      |
| >3 times a week (n=58)                | 0.09±0.08 |      |
| <b>Cholesterol-lowering treatment</b> |           | 0.08 |
| No (n=169)                            | 0.11±0.13 |      |
| Yes (n=16)                            | 0.05±0.04 |      |
| <b>Vitamins</b>                       |           | 0.95 |
| No (n=173)                            | 0.10±0.13 |      |
| Yes (n=12)                            | 0.10±0.10 |      |
| <b>PS-enriched supplements</b>        |           | 0.60 |

|                         |           |      |
|-------------------------|-----------|------|
| No (n=177)              | 0.10±0.13 | 0.34 |
| Yes (n=8)               | 0.08±0.04 |      |
| <b>Vegetarian-vegan</b> |           |      |
| No (n=176)              | 0.10±0.12 |      |
| Yes (n=9)               | 0.17±0.20 |      |

*S2b. Association between plasma phytosterols and continuous variables (univariant analysis)*

| Variable (n)                      | B (95% CI)                | p (R <sup>2</sup> )      |
|-----------------------------------|---------------------------|--------------------------|
| <b>Total phytosterols (µg/mL)</b> |                           |                          |
| <b>Age</b> (years)                | 0.008 (-0.003 – 0.020)    | 0.154 (0.011)            |
| <b>BMI</b> (kg/m <sup>2</sup> )   | -0.041 (-0.091 – 0.009)   | 0.108 (0.014)            |
| <b>α-Tocopherol</b> (µmol/L)      | 0.011 (-0.023– 0.046)     | 0.519 (0.002)            |
| <b>FI</b>                         | -0.071 (-0.258 – 0.116)   | 0.455 (0.003)            |
| <b>VII</b>                        | 0.081 (-0.082 – 0.244)    | 0.328 (0.005)            |
| <b>Creatinine</b> (µmol/L)        | -0.010 (-0.023 – 0.003)   | 0.118 (0.013)            |
| <b>AP</b> (µkat/L)                | 0.448 (-0.329 – 1.226)    | 0.257 (0.007)            |
| <b>ALT</b> (µkat/L)               | -0.421 (-2.09 – 1.251)    | 0.620 (0.001)            |
| <b>Sitosterol (µg/mL)</b>         |                           |                          |
| <b>Age</b> (years)                | -0.005 (-0.010 – 0.000)   | <b>0.050</b> (0.021)     |
| <b>BMI</b> (kg/m <sup>2</sup> )   | -0.035 (-0.057 – (-0.013) | <b>0.002</b> (0.052)     |
| <b>α-Tocopherol</b> (µmol/L)      | 0.008 (-0.008 – 0.023)    | 0.319 (0.005)            |
| <b>FI</b>                         | -0.057 (-0.140 – 0.027)   | 0.181 (0.010)            |
| <b>VII</b>                        | 0.063 (-0.010 – 0.135)    | 0.090 (0.016)            |
| <b>Creatinine</b> (µmol/L)        | -0.003 (-0.009 – 0.003)   | 0.300 (0.006)            |
| <b>AP</b> (µkat/L)                | -0.076 (-0.424 – 0.273)   | 0.669 (0.001)            |
| <b>ALT</b> (µkat/L)               | -0.308 (-1.054 – 0.438)   | 0.416 (0.004)            |
| <b>Campesterol (µg/ml)</b>        |                           |                          |
| <b>Age</b> (years)                | 0.012 (0.005 – 0.019)     | <b>0.001</b> (0.059)     |
| <b>BMI</b> (kg/m <sup>2</sup> )   | -0.010 (-0.041 – 0.021)   | 0.521 (0.002)            |
| <b>α-Tocopherol</b> (µmol/L) ¥    | -0.003 (-0.210 – 2.100)   | 0.998 (0.000)            |
| <b>FI</b>                         | -0.028 (-0.143 – 0.086)   | 0.626 (0.001)            |
| <b>VII</b>                        | 0.017 (-0.083 – 0.117)    | 0.739 (0.001)            |
| <b>Creatinine</b> (µmol/L)        | -0.007 (-0.015 – 0.000)   | 0.062 (0.019)            |
| <b>AP</b> (µkat/L)                | 0.429 (-0.046 – 0.903)    | 0.076 (0.017)            |
| <b>ALT</b> (µkat/L)               | -0.255 (-1.279 – 0.769)   | 0.624 (0.001)            |
| <b>Sitostanol (µg/ml)</b>         |                           |                          |
| <b>Age</b> (years)                | 0.000 (0.000 – 0.000)     | <b>&lt;0.001</b> (0.095) |
| <b>BMI</b> (kg/m <sup>2</sup> )   | -0.001 (-0.002 – 0.000)   | <b>&lt;0.001</b> (0.066) |
| <b>α-Tocopherol</b> (µmol/L) ¥    | 0.008 (0.000 – 0.001)     | 0.713 (0.001)            |
| <b>FI</b>                         | -0.001 (-0.003 – 0.001)   | 0.467 (0.003)            |
| <b>VII</b>                        | 0.002 (0.000 – 0.004)     | <b>0.032</b> (0.025)     |

|                                 |                         |                          |
|---------------------------------|-------------------------|--------------------------|
| <b>Creatinine</b> (μmol/L) ‡    | -0.008 (-0.000 – 0.000) | 0.315 (0.006)            |
| <b>AP</b> (μkat/L)              | -0.009 (-0.019 – 0.000) | <b>0.052</b> (0.020)     |
| <b>ALT</b> (μkat/L)             | -0.011 (-0.032 – 0.009) | 0.284 (0.006)            |
| <b>Lanosterol (μg/ml)</b>       |                         |                          |
| <b>Age</b> (years)              | 0.002 (0.002 – 0.003)   | <b>&lt;0.001</b> (0.229) |
| <b>BMI</b> (kg/m <sup>2</sup> ) | 0.007 (0.004 – 0.010)   | <b>&lt;0.001</b> (0.095) |
| <b>α-Tocopherol</b> (μmol/L)    | 0.001 (-0.001 – 0.003)  | 0.458 (0.003)            |
| <b>FI</b>                       | 0.006 (-0.006 – 0.018)  | 0.321 (0.005)            |
| <b>VII</b>                      | -0.001 (-0.011 – 0.009) | 0.847 (0.000)            |
| <b>Creatinine</b> (μmol/L) ‡    | 0.008 (-0.100 – 0.100)  | 0.843 (0.000)            |
| <b>AP</b> (μkat/L)              | 0.056 (0.008 – 0.105)   | <b>0.021</b> (0.029)     |
| <b>ALT</b> (μkat/L)             | 0.062 (-0.042 – 0.166)  | 0.243 (0.007)            |
| <b>Stigmasterol (μg/ml)</b>     |                         |                          |
| <b>Age</b> (years)              | 0.000 (-0.001 – 0.001)  | 0.357 (0.005)            |
| <b>BMI</b> (kg/m <sup>2</sup> ) | 0.000 (-0.004 – 0.005)  | 0.865 (0.000)            |
| <b>α-Tocopherol</b> (μmol/L)    | 0.002 (-0.001 – 0.005)  | 0.151 (0.011)            |
| <b>FI</b>                       | -0.001 (-0.017 – 0.015) | 0.887 (0.000)            |
| <b>VII</b>                      | 0.003 (-0.011 – 0.017)  | 0.681 (0.001)            |
| <b>Creatinine</b> (μmol/L)      | 0.000 (-0.001 – 0.001)  | 0.794 (0.000)            |
| <b>AP</b> (μkat/L)              | 0.012 (-0.054 – 0.079)  | 0.717 (0.001)            |
| <b>ALT</b> (μkat/L)             | 0.123 (-0.019 – 0.265)  | 0.089 (0.016)            |

*FI: Fat intake index; VII: vegetal intake index; AP: alkaline phosphatase; ALT: alanine transaminase*  
 ‡B (95% CI)\*100

S3. Bonferroni simultaneous multiple comparison test: Total phytosterol, campesterol and sitosterol for each variant (rs424579, rs4148217PS and rs6577152)

| Variants                      | Total PS         |       | Sitosterol       |       | Campesterol      |              |
|-------------------------------|------------------|-------|------------------|-------|------------------|--------------|
|                               | Mean differences | P     | Mean differences | p     | Mean differences | p            |
| rs4245791_TT vs. rs4245791_CC | -0.57            | 0.321 | -0.17            | 0.683 | -0.47            | 0.077        |
| rs4245791_TC vs. rs4245791_CC | -0.41            | 0.574 | -0.23            | 0.345 | -0.20            | 0.722        |
| rs4148217_AA vs. rs4148217_CC | 0.10             | 1.000 | -0.17            | 0.891 | 0.40             | 0.614        |
| rs4148217_AC vs. rs4148217_CC | -0.39            | 0.149 | -0.19            | 0.059 | -0.12            | 0.853        |
| rs6577152_TT vs. rs6577152_GG | 0.30             | 0.477 | 0.09             | 0.993 | 0.26             | 0.077        |
| rs6577152_GT vs. rs6577152_GG | 0.52             | 0.077 | 0.17             | 0.198 | 0.35             | <b>0.035</b> |
